# Supplementary material
Source: PubMed Central journal article supplement (PMC6583797)
Supplement: NIHMS1023637-supplement-Supplemental_Information.pdf [file NIHMS1023637-supplement-Supplemental_Information.pdf]

**Cell Metabolism, Volume 29**

**Supplemental Information**

**Metabolic Reprogramming in Astrocytes**

**Distinguishes Region-Specific Neuronal**

**Susceptibility in Huntington Mice**

**Aris A. Polyzos, Do Yup Lee, Rupsa Datta, Meghan Hauser, Helen Budworth, Amy Holt, Stephanie Mihalik, Pike Goldschmidt, Ken Frankel, Kelly Trego, Michael J. Bennett, Jerry Vockley, Ke Xu, Enrico Gratton, and Cynthia T. McMurray**

Table S1. Metabolites Altered in STR of *HdhQ(150/150)* young animals  
(Related to Figure 3 and Figure 4)

| <b>Lipids</b>                              |                |                |                |                                                            |
|--------------------------------------------|----------------|----------------|----------------|------------------------------------------------------------|
| <b>Metabolite (acyl chain)</b>             | <b>p value</b> | <b>Q value</b> | <b>(HD/WT)</b> | <b>Function</b>                                            |
| stearic acid (FFA)(18)                     | 0.025          | 0.048          | 1.153          | Free Fatty acid (Per)                                      |
| palmitic acid (FFA)(16)                    | 0.008          | 0.026          | 1.256          | Free Fatty acid (Per)                                      |
| lauroyl-carnitine (12)                     | 0.031          | 0.048          | 0.672          | Mitochondrial import (Per –MT)                             |
| myristoyl-carnitine (14)                   | 0.027          | 0.048          | 0.627          | Mitochondrial import (Per –MT)                             |
| Hexadecenoyl-carnitine (16)                | 0.041          | 0.051          | 0.724          | Mitochondrial import (Per – MT)                            |
| palmitoyl-carnitine (16)                   | 0.009          | 0.026          | 0.650          | Mitochondrial import (Per – MT)                            |
| 2-monopalmitin (16)                        | 0.013          | 0.031          | 1.483          | Palmitic acid $\beta$ -monoglyceride (MT)                  |
| 1-monopalmitin (16)                        | 0.015          | 0.034          | 1.406          | Palmitic acid $\alpha$ -monoglyceride (MT)                 |
| 1-monostearin (18)                         | 0.030          | 0.048          | 1.391          | Stearic acid $\beta$ -monoglyceride (MT)                   |
| 2-monostearin (18)                         | 0.041          | 0.051          | 1.548          | Stearic acid $\alpha$ -monoglyceride (MT)                  |
| <b>Amino acids, nucleoside, polyamines</b> |                |                |                |                                                            |
| <b>Name</b>                                | <b>p value</b> | <b>Q value</b> | <b>(HD/WT)</b> | <b>Function</b>                                            |
| Asp                                        | 0.011          | 0.029          | 0.901          | Non-essential aa/glycoprotein synthesis                    |
| Trp                                        | 0.012          | 0.030          | 0.511          | Precursor to the neurotransmitter serotonin                |
| homocystine                                | 0.015          | 0.034          | 0.520          | Breakdown product of protein metabolism                    |
| Asn                                        | 0.033          | 0.051          | 0.488          | Nonessential $\alpha$ -amino acid for protein biosynthesis |
| Met                                        | 0.040          | 0.051          | 0.740          | $\alpha$ -amino acid for protein biosynthesis              |
| Lys                                        | 0.041          | 0.051          | 0.530          | $\alpha$ -amino acid for protein biosynthesis              |
| Thr                                        | 0.044          | 0.051          | 0.657          | Essential amino acid                                       |
| homoserine                                 | 0.046          | 0.052          | 0.834          | Reactive variant of serine                                 |
| Tyr*                                       | 0.049          | 0.052          | 0.512          | Production of neurotransmitters                            |
| cysteine*                                  | 0.049          | 0.052          | 0.758          | Component of the antioxidant, glutathione                  |
| N-acetylaspartate                          | 0.035          | 0.051          | 0.477          | High in brain, marks viability                             |
| methanolphosphate                          | 0.018          | 0.038          | 0.813          | Derivatives of inosine                                     |
| FAD                                        | 0.008          | 0.026          | 1.370          | Redox cofactor                                             |
| spermidine                                 | 0.044          | 0.102          | 0.409          | DNA stability, cell proliferation                          |
| <b>Others</b>                              |                |                |                |                                                            |
| <b>Metabolite</b>                          | <b>p value</b> | <b>Q value</b> | <b>(HD/WT)</b> | <b>Function</b>                                            |
| ribitol                                    | 0.044          | 0.029          | 0.608          | End product of pentose phosphate pathway                   |
| 1.5-anhydroglucitol                        | 0.012          | 0.029          | 0.813          | Associated with glucose fluctuation                        |
| inulobiose                                 | 0.041          | 0.051          | 1.378          | 1-O- $\beta$ -D-fructofuranosyl-D-Fructose                 |
| glucose                                    | 0.044          | 0.051          | 0.608          | Glycolysis                                                 |
| G1P                                        | 0.001          | 0.016          | 0.576          | Converts to Glucose                                        |
| G6P                                        | 0.026          | 0.048          | 0.633          | Glycolysis                                                 |
| acetophenone                               | 0.028          | 0.048          | 2.634          | Aromatic ketone                                            |
| phosphoric acid                            | 0.048          | 0.052          | 1.543          | Related with autoimmune disease                            |

\* indicates the metabolites that do not pass the additional criteria (FDR<0.056 with Delta=1) by Significance Analysis of Microarray (SAM).

Table S2. TCA intermediates altered in the STR and CBL of *HdhQ(150/150)* animals (related to Figure 3 and Figure 4)

| Brain Region   | Striatum           |                    |                  |                    | Cerebellum         |                    |                  |                    |
|----------------|--------------------|--------------------|------------------|--------------------|--------------------|--------------------|------------------|--------------------|
| Age            | Young <sup>a</sup> |                    | Old <sup>b</sup> |                    | Young <sup>a</sup> |                    | Old <sup>b</sup> |                    |
|                | p value            | Ratio <sup>c</sup> | p value          | Ratio <sup>c</sup> | p value            | Ratio <sup>c</sup> | p value          | Ratio <sup>c</sup> |
| malic acid     | 0.001              | 0.737              | 0.496            | 0.936              | 0.862              | 1.012              | 0.715            | 0.966              |
| fumaric acid   | 0.007              | 0.483              | 0.531            | 0.917              | 0.613              | 0.954              | 0.177            | 0.839              |
| aconitic acid  | 0.036              | 0.541              | 0.628            | 1.054              | 0.480              | 0.946              | 0.034            | 0.838              |
| isocitric acid | 0.065              | 0.808              | 0.397            | 1.078              | 0.866              | 0.989              | 0.885            | 1.013              |
| citric acid    | 0.102              | 0.849              | 0.382            | 1.062              | 0.566              | 1.040              | 0.825            | 1.023              |
| succinate      | 0.201              | 0.865              | 0.904            | 1.009              | 0.069              | 1.183              | 0.472            | 0.915              |

a. 12-16wks; b. >80wks; c. ratio = HD/WT.

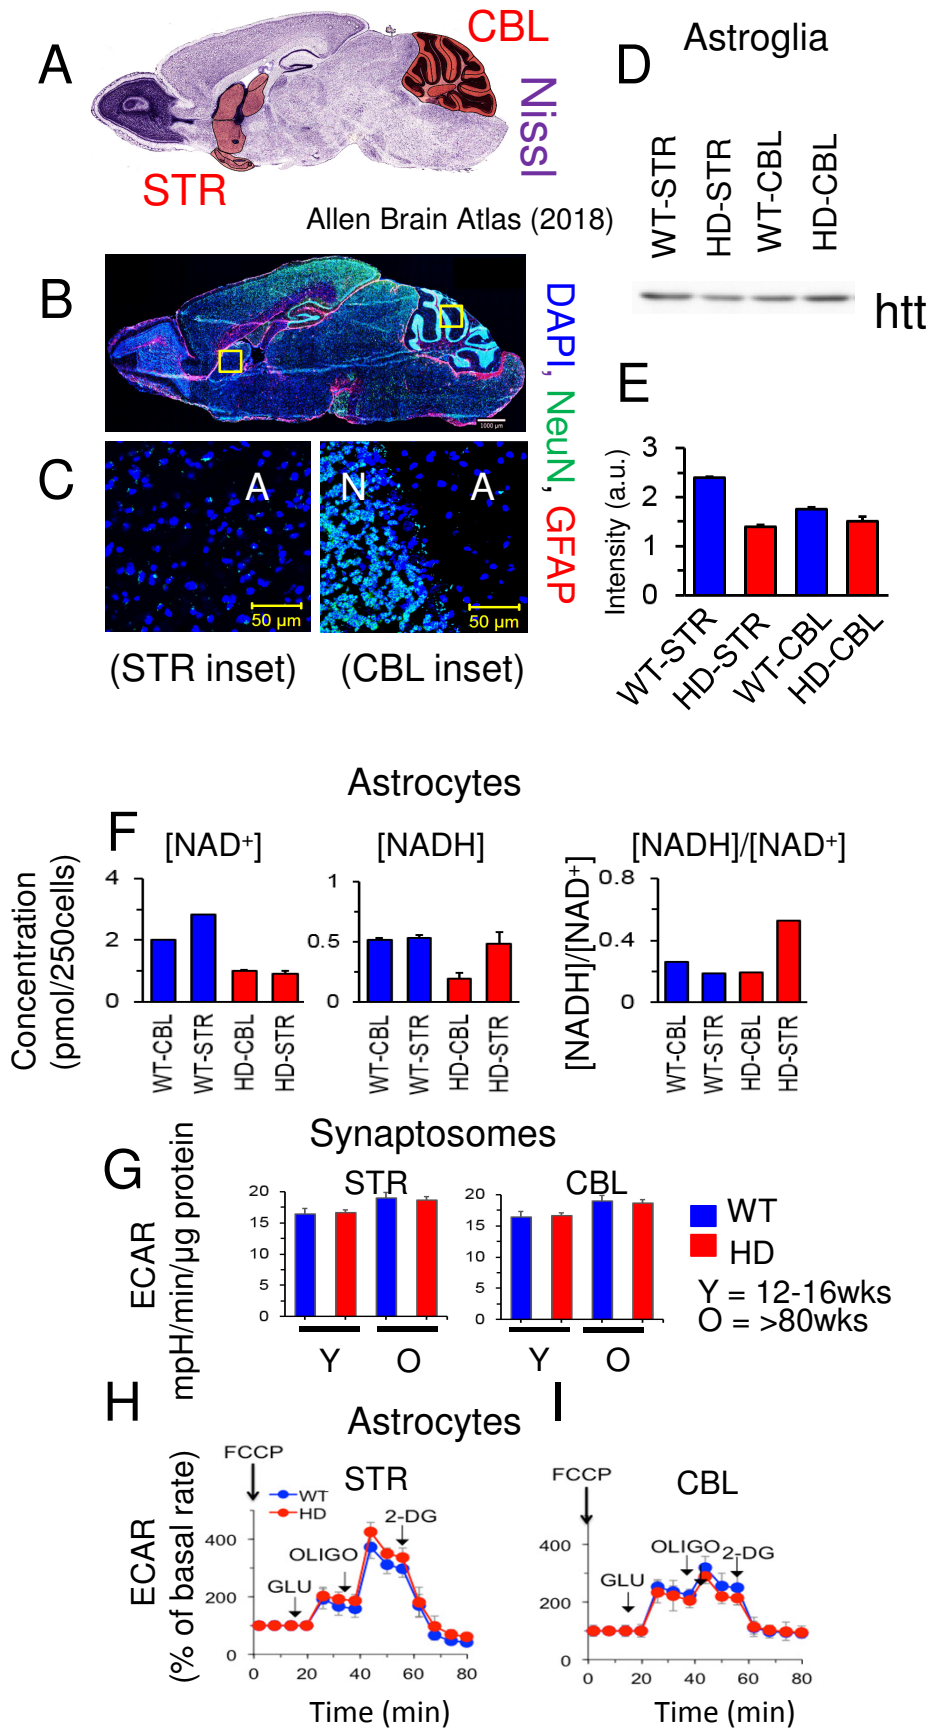

Figure S1

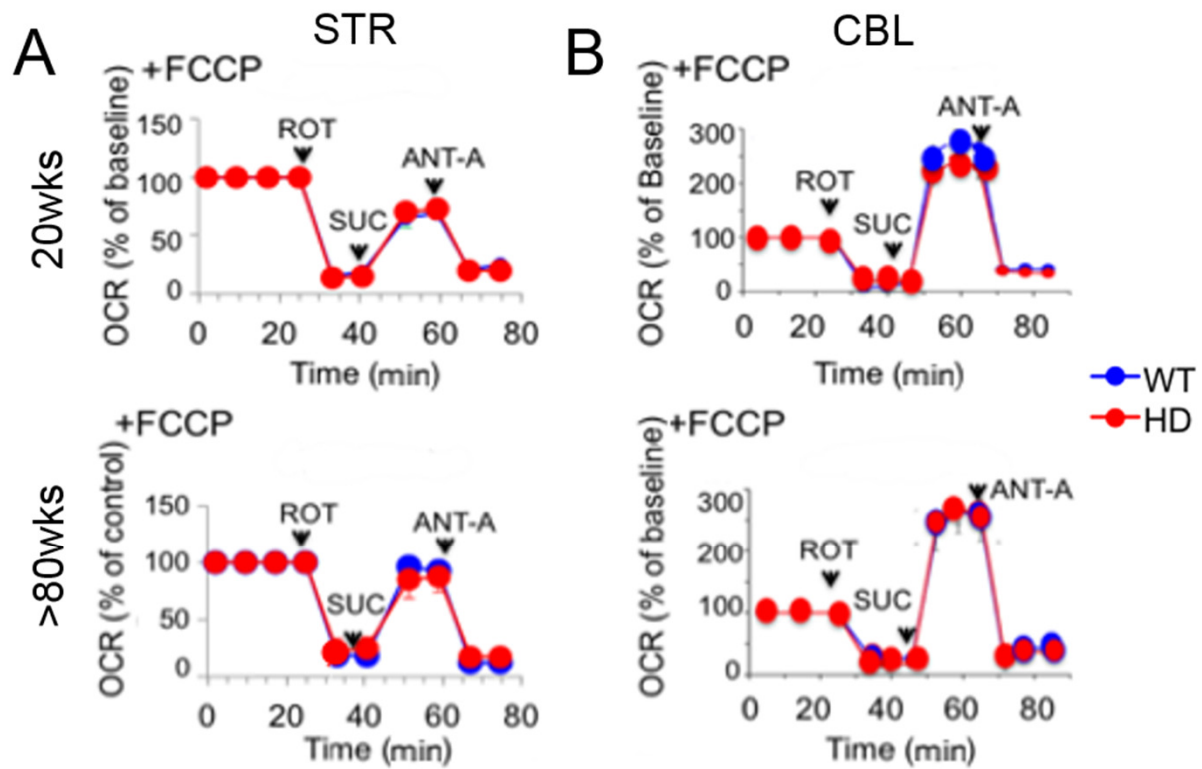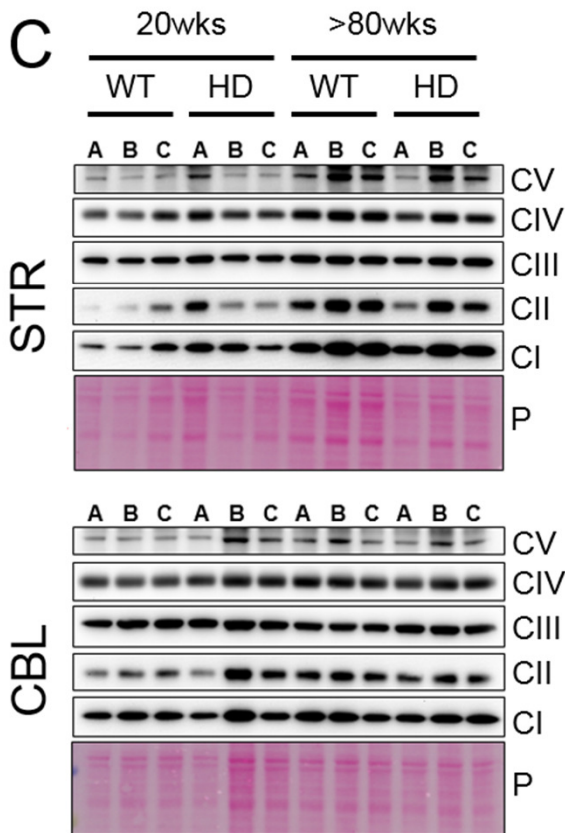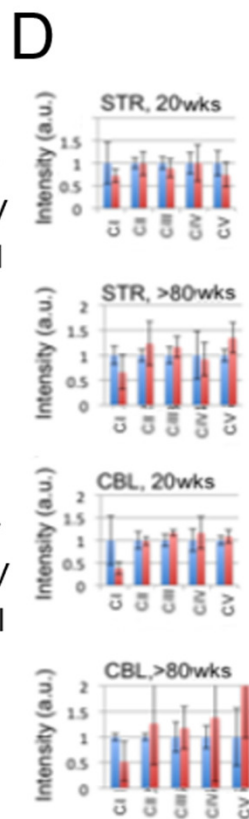

**E**

STR  
(OD/min/ $\mu$ g protein)

| ETCgen | 20wks | 80wks          |                 |
|--------|-------|----------------|-----------------|
| C I    | WT    | 87.0 $\pm$ 6.0 | 71.0 $\pm$ 9.0  |
|        | HD    | 82.0 $\pm$ 9.0 | 82.0 $\pm$ 11.0 |
| C II   | WT    | 33.0 $\pm$ 8.0 | 28.0 $\pm$ 8.0  |
|        | HD    | 34.0 $\pm$ 5.0 | 31.0 $\pm$ 6.0  |
| C IV   | WT    | 4.1 $\pm$ 1.5  | 4.7 $\pm$ 1.2   |
|        | HD    | 3.8 $\pm$ 1.4  | 3.5 $\pm$ 1.1   |

**F**

CBL  
(OD/min/ $\mu$ g protein)

| ETCgen | 20wks | 80wks          |                |
|--------|-------|----------------|----------------|
| C I    | WT    | 97.0 $\pm$ 0.7 | 83.0 $\pm$ 7.0 |
|        | HD    | 91.0 $\pm$ 1.3 | 78.0 $\pm$ 6.0 |
| C II   | WT    | 47.0 $\pm$ 8.0 | 46 $\pm$ 6.0   |
|        | HD    | 34.0 $\pm$ 5.0 | 43.0 $\pm$ 7.0 |
| C IV   | WT    | 4.1 $\pm$ 1.5  | 4.1 $\pm$ 0.8  |
|        | HD    | 3.8 $\pm$ 1.4  | 3.8 $\pm$ 1.3  |

Figure S2

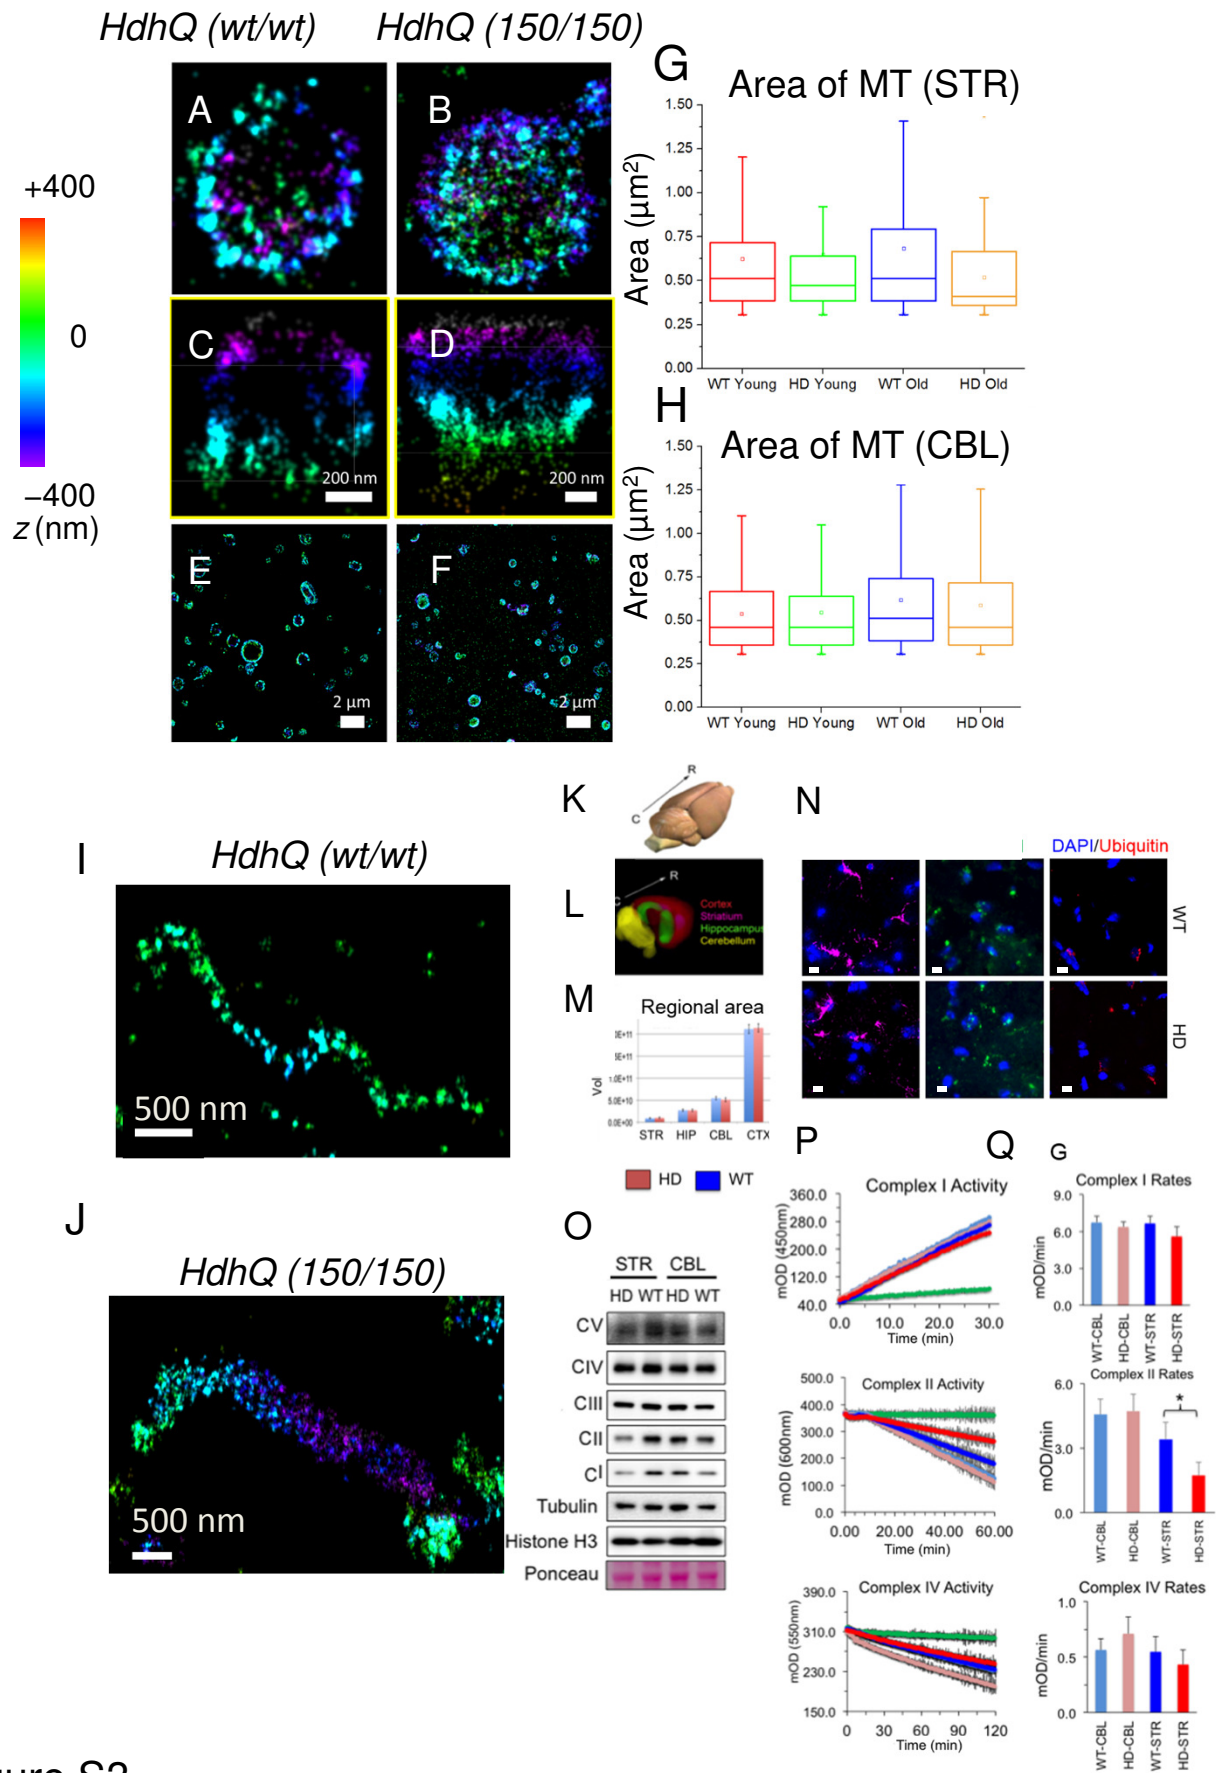

Figure S3

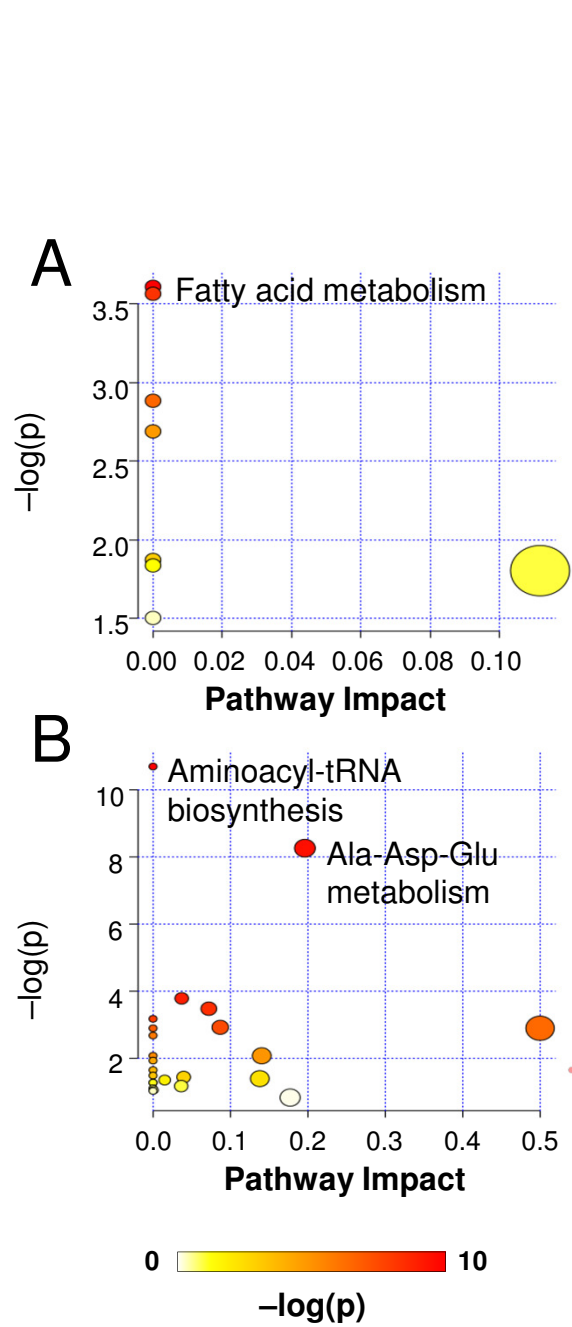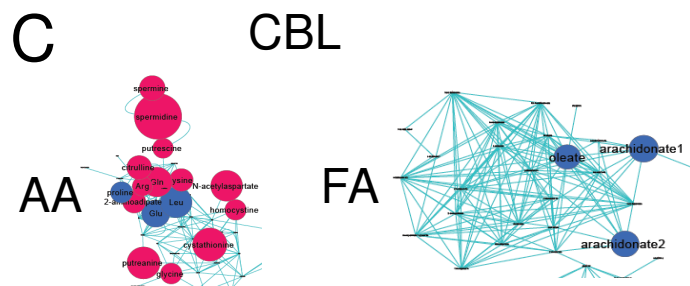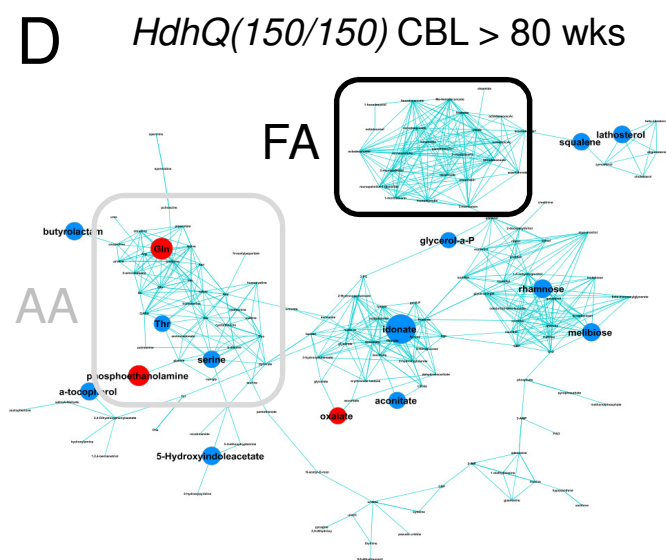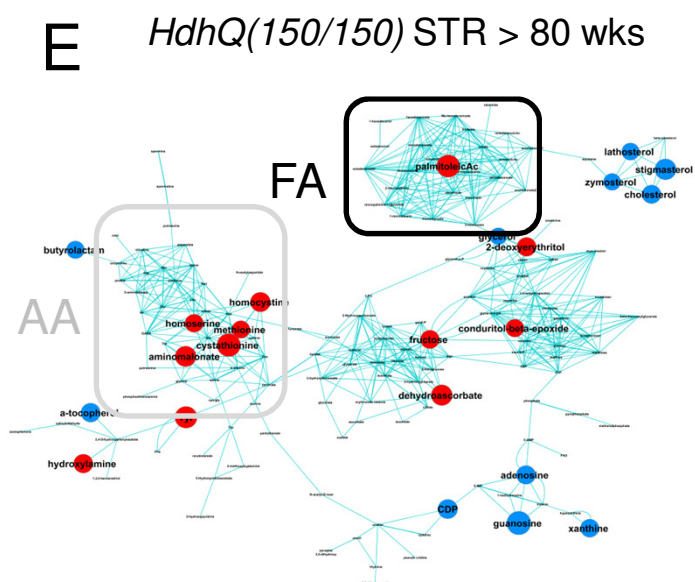

Figure S4

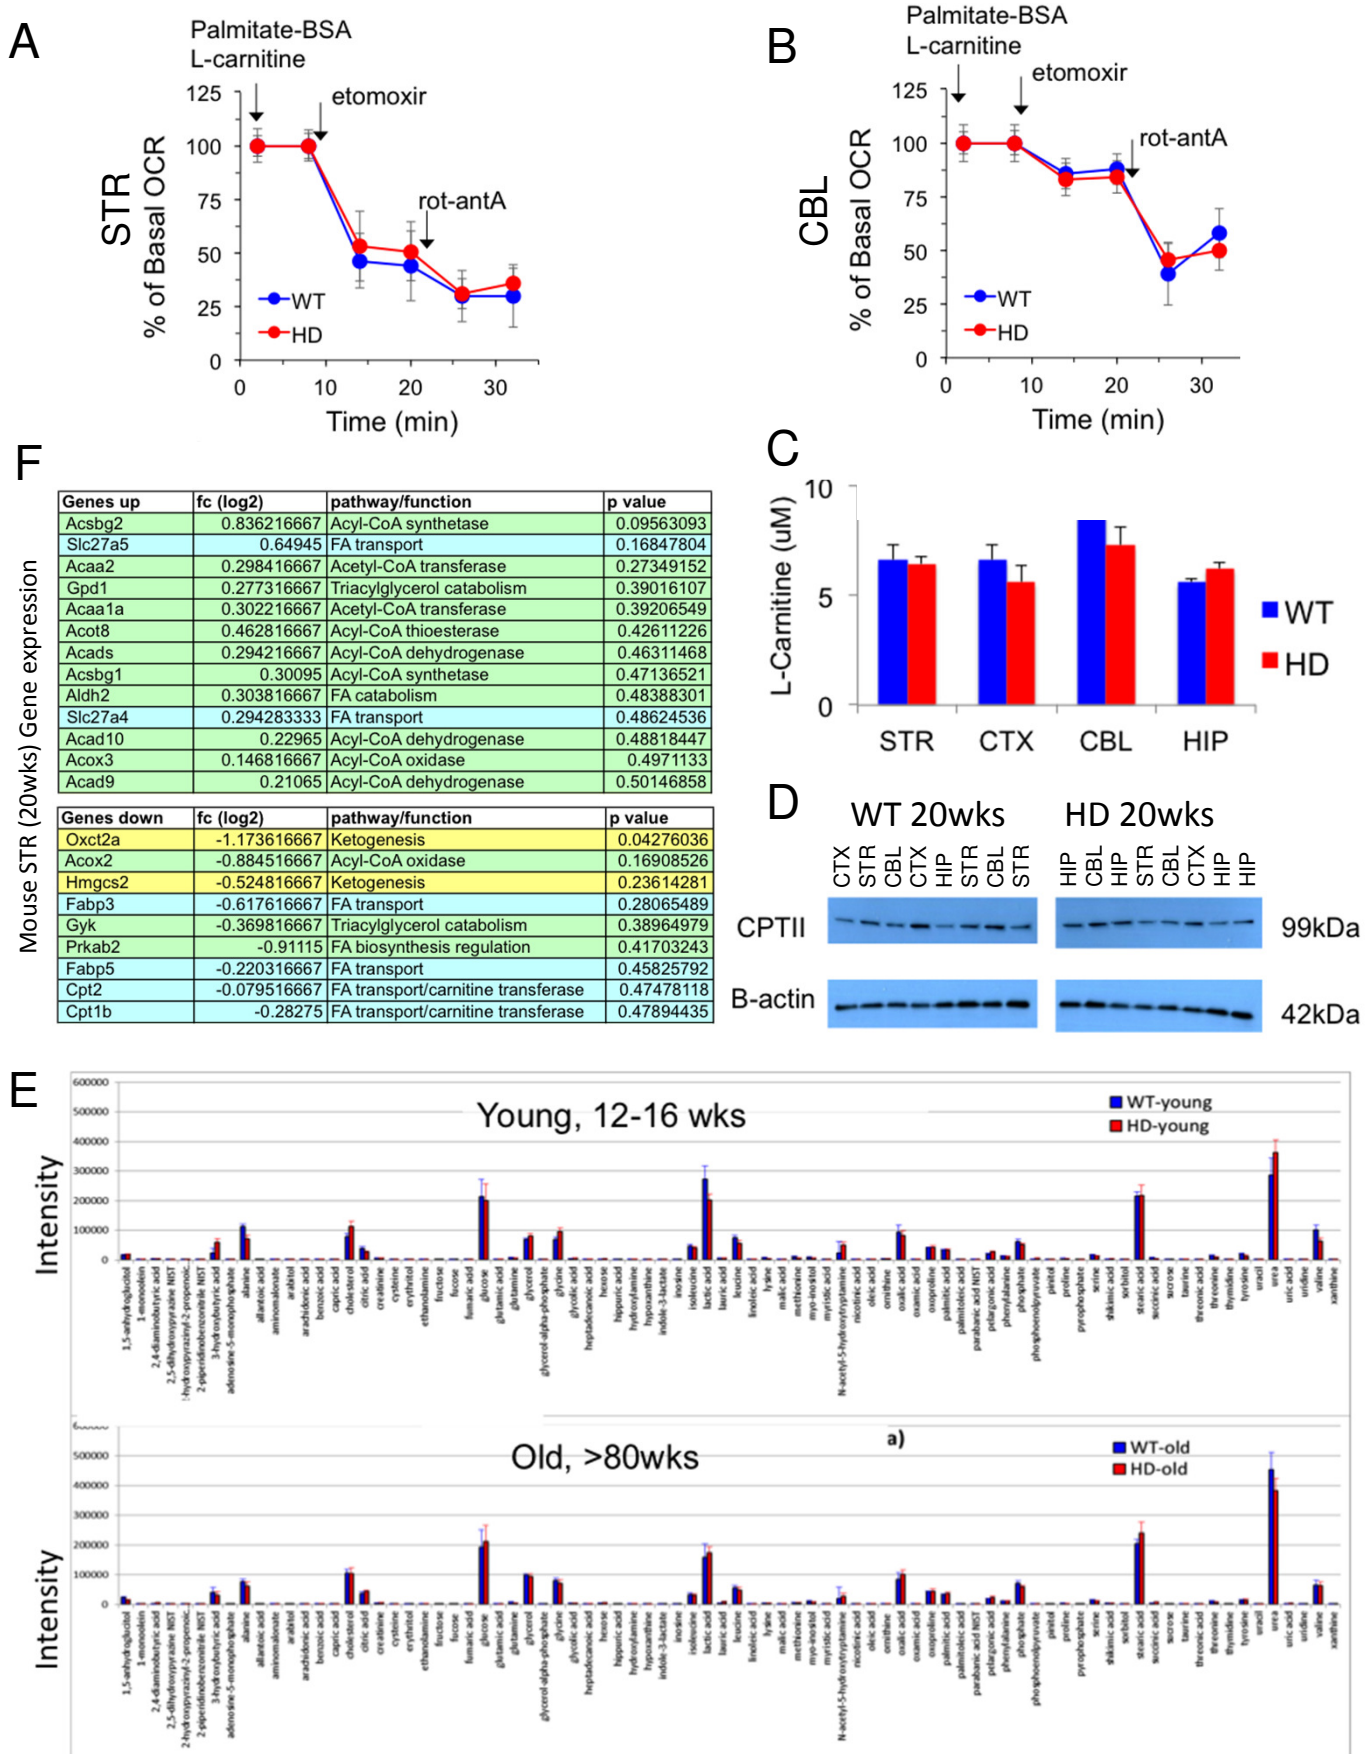

Figure S5



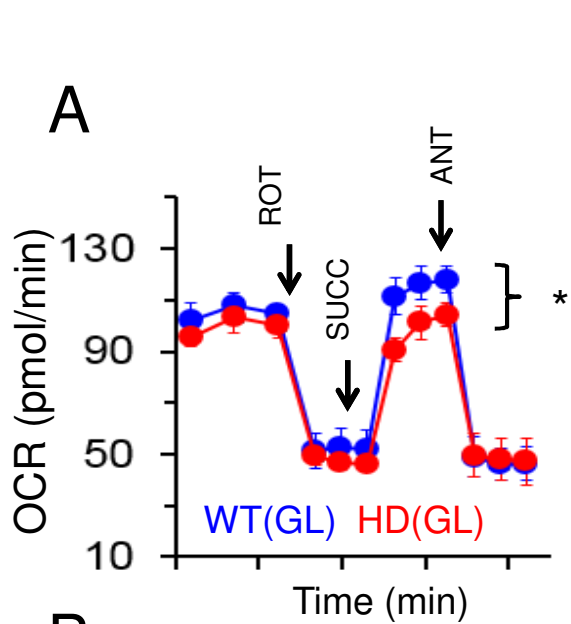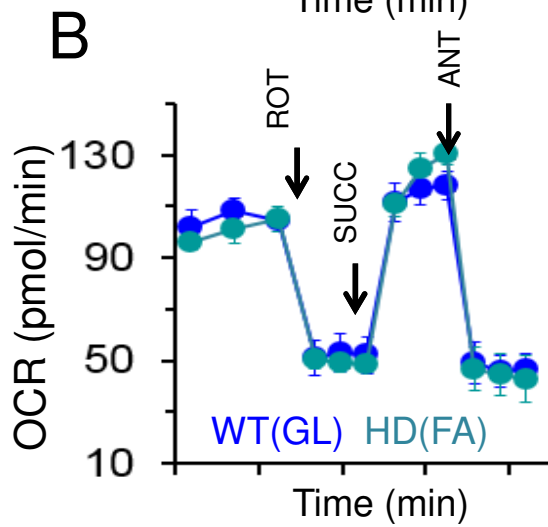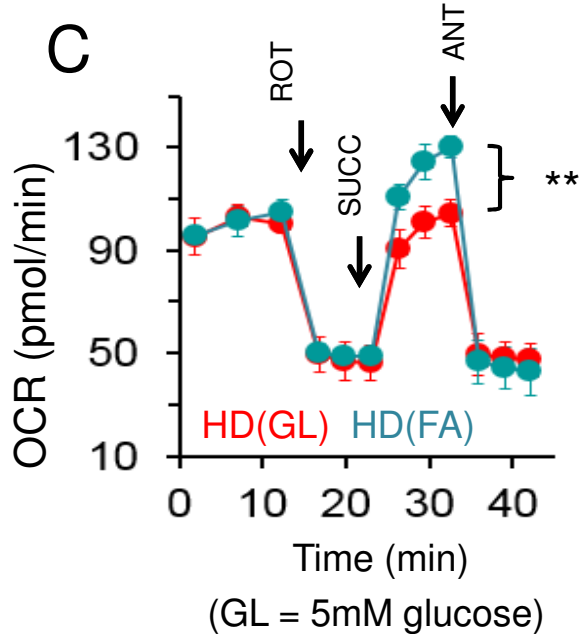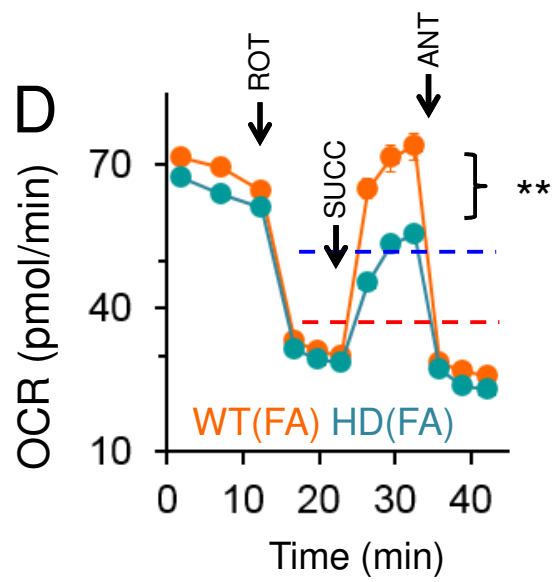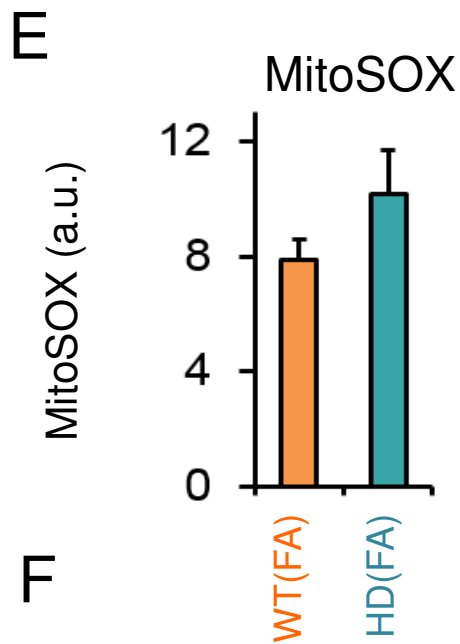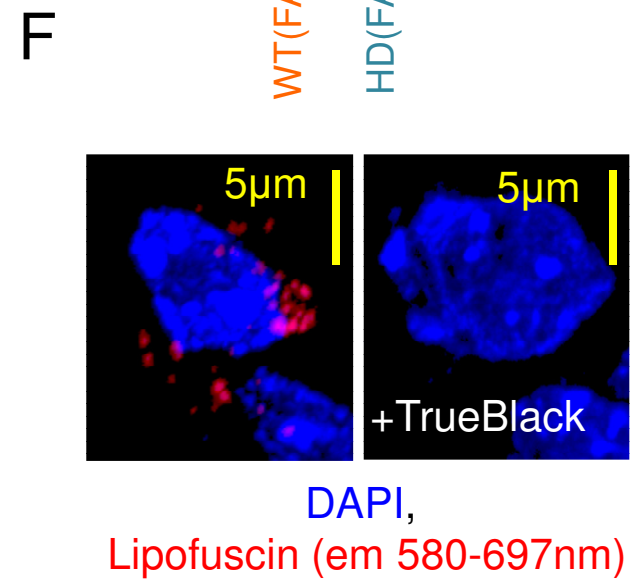

Figure S6

## SUPPLEMENTAL FIGURE LEGENDS

**Figure S1. Astrocyte-rich regions in the STR and CBL have similar cell content (Related to Figure 1).**

**(A)** A representative sagittal section from an *HdhQ(150/150)* animal used for FLIM scanning. The cartoon (red overlay on Nissl stained tissue) shows the striatum (STR) and cerebellum (CBL), as indicated.

**(B)** A representative sagittal section from an *HdhQ(150/150)* animal stained to visualize astrocytes and neurons. The section was stained with DAPI (blue), which identifies all cell nuclei and the NeuN antibody (green) which stains only neurons. The neuronal cells are distinguished as turquoise by overlap of the green and blue signals, while astrocytes are blue. Astrocyte processes are stained by GFAP (red). Yellow boxes indicate the regions, which are magnified in (C).

**(C)** Magnified image of the scanned regions boxed in C. (Left, STR) Neurons (N)(turquoise) are interspersed among 80-90% astrocytes (A) (blue). (Right, CBL) A border area in the CBL contains a densely staining neuronal population (N) (turquoise) which lies adjacent to astrocytes (A) (blue). The less dense astrocyte segment is similar in composition to the STR (left).

**(D)** The level of expressed mhtt in astrocytes isolated from STR and from CBL of (*HdhQ(wt/wt)*)(WT) and (*HdhQ(150/150)*)(HD) animals. The western blot was probed with anti-htt antibody (Invitrogen MAB 2168). (n = 2).

**(E)** Quantification of the chemiluminescence from the secondary antibody horseradish peroxidase (HRP) used in the western blots for (D). The bands were normalized for total protein. Astrocytes

from individual animals (n = 3) were pooled in the experiment, and measured in duplicate. Error bars represent SE.

**(F)** NADH/NAD<sup>+</sup> ratio is elevated in STR relative to the CBL of *HdhQ(150/150)* mice. Colorimetric analysis for NAD<sup>+</sup> and NADH levels from striatal and cerebellar astrocytes from *HdhQ(wt/wt)* (WT) (blue) or *HdhQ(150/150)* mice (red). NADH alone, NAD<sup>+</sup> alone, and the NADH/NAD<sup>+</sup> ratio were determined for n=250 cells using a commercial Abcam(AB65348) kit, measured in duplicate. In all panels, the error bars represent SE.

**(G)** The activity of the glycolytic enzymes is equivalent in striatal and cerebellar synaptosomes under basal conditions at young (Y) (12-16 weeks) and old (O) (>80 weeks) ages. Glycolysis was measured as the extracellular acidification rate (ECAR) ( $\Delta$ pH/min/ $\mu$ g of total protein) in the presence of 15mM D-glucose and measured using a Seahorse XF96 Extracellular Flux Analyzer. *HdhQ(wt/wt)* (WT) (blue) and *HdhQ(150/150)*(HD) mice (red). Error bars are SE (n = 3-6 biological replicates, each replicate was measured 8-15 times).

**(H and I)** The ECAR with time for FCCP-stimulated astrocytes from the (H) STR and the (I) CBL was measured after addition of glucose to glucose-starved synaptosomes. Oxidative phosphorylation was blocked (with oligomycin) leaving only the glycolytic pathway for consumption of glucose. Lastly glycolysis was blocked with the hexokinase inhibitor, 2-deoxyglucose (2-DG). ECAR was measured as a function of time (in minutes) after addition of substrates and inhibitors. There were regional but no genotype-specific differences in ECAR. GLU is glucose, OLIGO is oligomycin (an inhibitor of complex V). The addition of reagents is indicated by the arrows. HD astrocytes (red); WT astrocytes (blue). Each experiment was performed with a minimum of n = 3 astrocyte samples, measured 3-8 times for each sample. n = 30-50 cells. *HdhQ(wt/wt)* (WT) or *HdhQ(150/150)* (HD). Error bars represent SE.

**Figure S2. There are no bioenergetic defects in synaptosomes from *HdhQ(150/150)* and *HdhQ(wt/wt)* littermates in any brain region at any age (Related to Figure 2)**

**(A and B)** Bioenergetic plots of OCR expressed versus time (minutes) expressed as % of control for astrocytes from STR (A) and CBL (B). The decoupler FCCP was added first to maximize mitochondrial electron flow, and inhibitors were added as indicated by black arrows. ROT is rotenone; SUC is succinate; and ANT-A is antimycin-A. Blue is WT and red is HD.

**(C and D)** The ETC complexes in synaptosomes from WT and HD animals were equally well expressed as detected by antibodies to the resolved proteins on SDS-PAGE gels (C). The protein expression levels in young (20wk) and old (>80wks) animals (C) were quantified (D) from the antibody staining intensities for CI (21kDa, ndufb8 subunit), CII (30kDa, SDH subunit B), CIII (49.5kDa, uqcrc2), CIV (40kDa, oxidative phosphorylation subunit 1) and CV (55kDa, ATP synth subunit alpha antibodies), normalized for Ponceau staining intensity (red-pink gels). (n = 2), error bars represent SE.

**(E and F)** Quantified enzymatic activity of ETC complexes CI, CIII, and CIV in synaptosomes from (E) STR and (F) CBL of WT and HD animals at young (20wk) and old (>80wks) ages, The enzymatic activities of CI, CIII, and CIV were measured as absorbance versus time (minutes) per  $\mu\text{g}$  protein. Activity was equivalent in synaptosomes of young (12-16weeks) or old (>80weeks) animals of both genotypes. (n = 3). CI activity measured at 450nm, CII activity measured at 600nm, CIV activity measured 550nm. Error bars represent SE.

**Figure S3. Structure and function are not altered in brain synaptosomes, while CII activity is reduced in astrocytes (Related to Fig. 2).**

**(A and B)** Zoomed-in representative 3-D image of an intact synaptosome from *HdhQ(wt/wt)* (WT) (A) and *HdhQ(150/150)* (HD) (B) animals (top panel). Scale bar is 200nm. The pseudocolor scale is shown (left).

**(C and D)** z cross-section of the top row images (A and B), respectively. Scale bar is 200nm. The pseudocolor scale is shown (left).

**(E and F)** Zoomed-out view displaying a super-resolution image of MT from isolated striatal synaptosomes of *HdhQ(wt/wt)* (WT) (left) and *HdhQ(150/150)* (HD) (right) animals stained with translocase of outer membrane protein 20 (TOM20), Scale bar is 2 $\mu$ m. The pseudocolor scale is shown (left).

**(G and H)** Box-and-whisker plot of the size distribution of mitochondria in isolated striatal (G) and cerebellar (H) synaptosomes. (top) The imaged samples from left to right: STR of young WT (red) and young HD (green) mice; STR of old WT (blue) and old HD (orange) mice. (H) Same as G for CBL. Size of the MT was determined based on epifluorescence images of TOM20. Note: only structures with size greater than 11 pixels were considered for this analysis; structures below this size are believed to be too small to be mitochondria. The average mitochondrial sizes in the striatal synaptosomes were somewhat smaller than in the CBL of old *HdhQ(150/150)* mice. *P* is two-tailed Student's t-test.

**(I and J)** 3-D STORM analysis of actin-spectrin cytoskeleton in isolated synaptosomes from *HdhQ(wt/wt)* (I) and *HdhQ(150/150)* (J) littermates. The quality of the synaptosomes preparations was determined in part by the maintenance of cytoskeleton, which is characterized by a stable spacing of spectrin and actin and is documented to be 180-190 nm in axons (Xu et al., 2013). The spectrin spacing in synaptic axons attached to isolated (I) *HdhQ(wt/wt)* brain synaptosomes is

distributed around 100-190 nm, while (J) the spectrin spacing in synaptic axons attached to isolated *HdhQ(150/150)* synaptosomes ranged from 150-180 nm. Scale bar is 500nm. These values are consistent with good structural integrity of the synaptosomes.

**(K and L)** Representative MRI for a young *HdhQ(wt/wt)* (WT) littermates. As judged by MRI imaging (K), the brain volume was well-developed in the brain of 20 week WT and HD animals. Caudal (C) - rostral (R) orientation of the brain of a 20 week WT animal is indicated. **(L)** Colors delineate the volumes of the CTX (red), STR (purple), HIP (green), and CBL (yellow) (L). Diagnostic imaging performed at the veterinary medicine teaching hospital (VMTH) at University of California Davis. Dimensions of the fields were set to 256x256x100 pixels and the voxel size to 117x117x122 $\mu$ m.

**(M)** Quantified volumes of brain regions from *HdhQ(wt/wt)* (WT) and *HdhQ(150/150)*(HD) littermates. Blue is WT and red is HD. Error bars represent SE, (n = 3 animals).

**(N)** Representative immunofluorescent staining of 10 $\mu$ m fixed tissue slices of striatum from brains of young (12-16wks old) *HdhQ(wt/wt)* and *HdhQ(150/150)* animals stained with antibodies against ubiquitin (red), IBA1 (green) and GFAP (magenta) overlaid on stained nuclei (blue, DAPI). These stains are measures of aggregates, activated microglia, and astrocytes respectively. There were no notable abnormalities that are genotype dependent. There was no evidence for microgliosis in the striatum (IBA1), for loss of astrocytes, or for increased aggregates due to disease at 12-16 weeks. Scale bars = 10 $\mu$ m. (Also reported previously in Polyzos *et al.*, 2016).

**(O)** SDS-PAGE gel images of resolved ETC complexes from astrocytes of STR and CBL of post-natal day (P2) used in the rate analysis (related to Figure 2D). Loading controls are tubulin,

histone H3 and ponceau stain (pink). Gel quantifications are described in Figure 2E and 2F. WT are *HdhQ(wt/wt)* and HD are *HdhQ(150/150)* animals.

**(P)** Representative kinetic curves to assess the rates of ETC enzyme activity (related to Figure 2D). Data were the results of a colorimetric microplate assay from Abcam (following manufacturers protocols). Plotted is the change in absorbance versus time (minutes) for background, and astrocyte extracts from STR and CBL of WT and HD astrocytes, as indicated: CI activity measured at 450nm, CII activity measured at 600nm, CIV activity measured 550nm. Absorbance versus time plots are matched by color-coding: no sample (green), WT-CBL (light blue), HD-CBL (pink), WT-STR (dark blue), and HD-STR (red). WT are *HdhQ(wt/wt)* and HD are *HdhQ(150/150)* animals.

**(Q)** The rate (mOD/min) of complex activity is calculated by the slope of kinetic curves in P (related to Figure 2D). The activity of CII is lower in the STR of HD versus WT animals, \* is  $p = 0.01$  (two-tailed Student's t-test).  $n = 6$  measurements for each astrocyte culture ( $n = 2$ ). WT are *HdhQ(wt/wt)* and HD are *HdhQ(150/150)* animals.

**Figure S4. Metabolic analysis from mass spectrometry (Related to Figure 3 and Figure 4).**

**(A and B)** Pathway over-representation analysis of significantly increased fatty acid metabolites (A) and decreased metabolites, as indicated (B) in HD STR at 12-16 weeks ( $n = 6$ ). The  $-\log(p)$  indicates a significant level of pathway alteration cumulatively computed by the significance of metabolite changes in a pathway. Pathway impact represents the readout from pathway topology analysis, based on relative-betweenness centrality. The node size and color are scaled according to statistical significance and pathway impact score, respectively. The color scale is shown.

**(C)** Enlarged views of MetaMapp panels for FA and AA basal composition in CBL of *HdhQ(wt/wt)* animal (Taken from *Lee et al., 2013*), which is similar to the metabolic composition of the CBL in the disease state.

**(D and E)** MetaMapp of CBL (D) and STR (E) at 80 weeks (n = 6) for the amino acids (AA) and fatty acid (FA) clusters. Node colors indicate significant changes of metabolite levels ( $p < 0.05$ , two-tailed Student's t-test) in *HdhQ(150/150)* (HD) brain regions compared to those in *HdhQ(wt/wt)* (WT) (red = elevated metabolites, blue = decreased metabolites in HD brain). Node size represents the fold change of differentially-expressed metabolite in HD brain compared to WT.

**Figure S5. The increase in FA metabolites is not due to alterations in FA access, gene expression, or a mitochondrial import block (Related to Figure 4 and Figure 5).**

**(A, and B)** There is no FA import inhibition in MT in STR of *HdhQ(150/150)* relative to *HdhQ(wt/wt)* littermates. The OCR was measured in astrocytes of the STR (A) or the CBL (B) grown in the presence of FAs (0.22mM palmitate-BSA). Import of L-malate and L-carnitine was subsequently measured by the reduction in OCR after addition of etomoxir (an inhibitor of carnitine palmitoyltransferase-1 (CPT-I)). Etomoxir addition reduced the OCR in MT of striatal or cerebellar astrocytes from *HdhQ(150/150)* and *HdhQ(wt/wt)* littermates to the same extent. OCR was further reduced by addition of rotenone (rot) and Antimycin-A (antA), which inhibit the electron transport chain complexes CI and CIV. There was no genotype-dependence to the inhibition. Red is HD and blue is WT.

**(C)** The L-carnitine levels were similar in both genotypes. Carnitine was measured using a commercial kit (Abcam ab83392). The error bars represent SE.



**(D)** The level of CPT-II was similar in both genotypes, indicating that the impact of blocking CPT-I was not altered by differences in CII. Antibody staining analysis of CPT-II by SDS-PAGE (WT 20 weeks (left), and HD 20 weeks (right)) was equivalent in astrocytes from *HdhQ(150/150)*, with  $\beta$ -actin as a loading control. (n = 3-4 mice brain regions analyzed per sample).

**(E)** Mass spectrometry analysis of plasma metabolites from 12-16wk or >80wk *HdhQ(150/150)* and *HdhQ(wt/wt)* littermates (n = 6 animals for each group). No significant differences of free FAs are observed from the blood plasma of HD animals relative to WT. Both genotypes show similar levels of other major metabolites including glucose, lactic acid and TCA intermediates. N = 3 pooled samples. Error bars are SE.

**(F)** Real time PCR analysis for a panel of 80 genes comprising enzymes of FA anabolism, transport, and catabolism. Eighty FA processing genes were assessed for their levels in STR of 20wk animals (3 animals per genotype) by real-time PCR. Some tended to increase and some to decrease, but none were statistically different (two-tailed Student's t-test,  $p > 0.05$ ) in striatal brain tissue of HD versus WT animals (where the FA accumulation was evident in their brains) (a partial list of the most significant is shown). Functionality of each gene is grouped as indicated by the color code. Green indicates genes for catabolic enzymes, yellow indicates genes for ketogenic enzymes, and turquoise indicates enzymes for import and transport. Gene expression was not significantly altered in *HdhQ(150/150)* animals at this early age. *P* from two-tailed Student's t-test.

**Figure S6. FA addition restores the succinate response in MT of striatal astrocytes in physiological glucose concentrations (5mM) (Related to Figure 6).**

(A-C) is similar to Figure 6A-6C except that GL is 5mM glucose (GL). ROT is rotenone; SUCC is succinate; and ANT is antimycin-A.

**(A)** Comparison of *HdhQ(wt/wt)* (WT) astrocytes and *HdhQ(150/150)* (HD) astrocytes in GL buffer ( $p < 0.05$ , two-tailed Student's t-test), ( $n = 3$ ).

**(B)** Comparison of *HdhQ(wt/wt)* (WT) astrocytes in GL buffer and *HdhQ(150/150)* (HD) astrocytes in FA buffer ( $p < 0.43$ , two-tailed Student's t-test), ( $n = 3$ ).

**(C)** Comparison of *HdhQ(150/150)* (HD) astrocytes in GL and FA buffer ( $p < 0.005$ , two-tailed Student's t-test), ( $n = 3$ ).

**(D)** Comparison of *HdhQ(wt/wt)* (WT) and *HdhQ(150/150)* (HD) astrocytes in FA media. FA increased CII-dependent OCR in astrocytes of *HdhQ(wt/wt)* (WT) animals if glucose was low ( $p < 0.005$ , two-tailed Student's t-test). Bioenergetic plots of OCR of WT and HD STR astrocytes in FA media, expressed as pmole/min. The decoupler FCCP was added first to maximize mitochondrial electron flow, and inhibitors were added as indicated by black arrows. ROT is rotenone; SUCC is succinate; and ANT is antimycin-A. For comparison red and blue dashed lines are OCR of WT-STR and HD-STR in GL respectively. The assay was performed in  $n = 3-6$  biological replicates with 5-8 repetitions for each cell type.

**(E)** MitoSOX staining intensity for *HdhQ(150/150)* (HD) or *HdhQ(wt/wt)* (WT) astrocytes at the indicated conditions.  $p = 0.154$ , two-tailed Student's t-test. Orange is WT and Turquoise is HD. The assay was performed in  $n = 3-6$  biological replicates with 5-8 repetitions for each cell type.

**(F)** Perinuclear lipofuscin granules are identified by autofluorescence (Related to Fig. 7). Autofluorescent granules were visualized at 580-697nm in astrocytes in a perinuclear orientation (red, left) after excitation at 561nm (z-stack image). Lipofuscin granule size was  $2.09 \pm 0.08 \mu\text{m}^2$

(WT) and  $2.93 \pm 0.08 \mu\text{m}^2$  (HD) at 100weeks. The signal disappears (right panel) after treatment of the cells with TrueBlack® (a modified form of Sudan Black) known to quench lipofuscin fluorescence. Scale bar is  $5\mu\text{m}$ .
